# Supplementary material for: Synthesis of self-assembling glycerotriazolophanes
Source: Royal Society of Chemistry journal article supplement (doi:10.1039/c2ra21341a), 2012-01-01

# SUPPLEMENTARY INFORMATION 1

## Synthesis of self-assembling glycerotriazolophanes

Mohit Tyagi, Nikhil Taxak, Prasad V. Bharatam, K. P. Ravindranathan Kartha\*

Department of Medicinal Chemistry, National Institute of Pharmaceutical Education and  
Research, SAS Nagar, Punjab 160062, India

\*E-mail: rkartha@niper.ac.in

## Table of Contents

|                                            |   |
|--------------------------------------------|---|
| <sup>1</sup> H NMR for Compound <b>5a</b>  | 2 |
| <sup>13</sup> C NMR for Compound <b>5a</b> | 3 |
| HRMS for Compound <b>5a</b>                | 4 |
| <sup>1</sup> H NMR for Compound <b>6a</b>  | 5 |
| <sup>13</sup> C NMR for Compound <b>6a</b> | 6 |
| HRMS for Compound <b>6a</b>                | 7 |
| DSC-Thermogram for Compound <b>5a</b>      | 8 |
| DSC-Thermogram for Compound <b>6a</b>      | 8 |

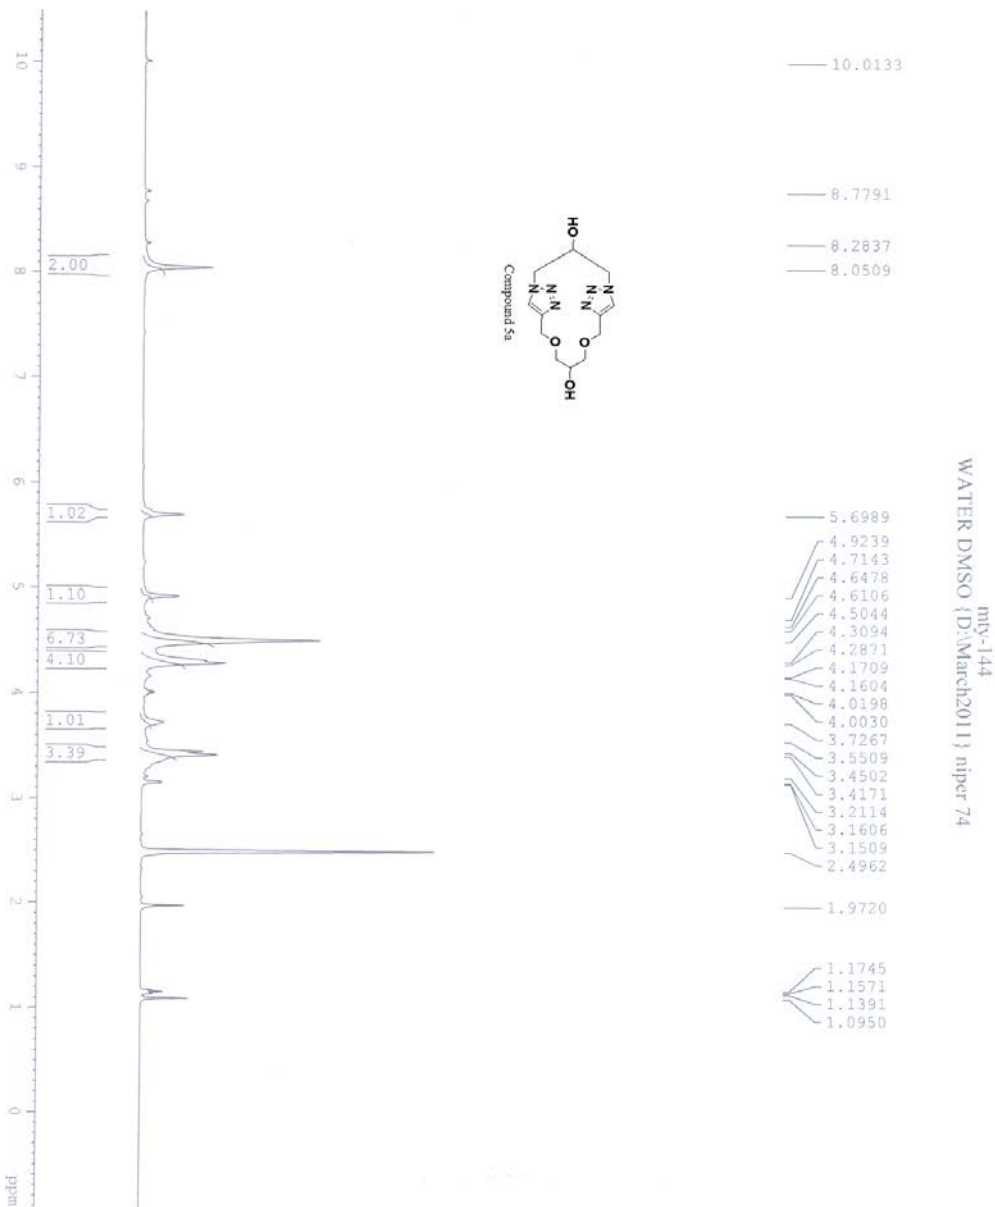

```

NAME          mty-144
EXPNO         11
PROCNO        1
Date_         20140324
Time          11.11
INSTRUM       spect
PROBHD        5 mm PABBO BB-
PULPROG       zgpgpr
TD            32768
SOLVENT       DMSO
NS            16
DS            2
SMH           8223.685 Hz
FIDRES        0.250967 Hz
AQ            1.9923444 sec
RG            203
DE            60.800 usec
TE            6.50 usec
D1            294.4 K
D12           2.00000000 sec
TD0           0.00002000 sec
===== CHANNEL f1 =====
NUC1          1H
P1            12.20 usec
PL1          -2.00 dB
P19           55.00 dB
PL19         14.80958652 W
PL19W        0.00002955 W
SFO1         400.1313802 MHz
SI           16384
SF           400.1300000 MHz
WDW           EM
SSB           0
LB           0.30 Hz
GB           0
PC           1.00
    
```

C13CPD DMSO (D:\March2011) niper 120

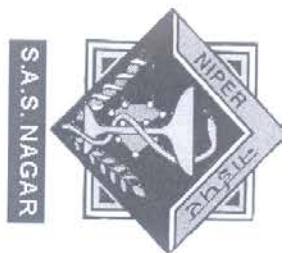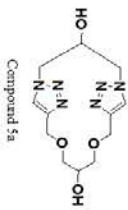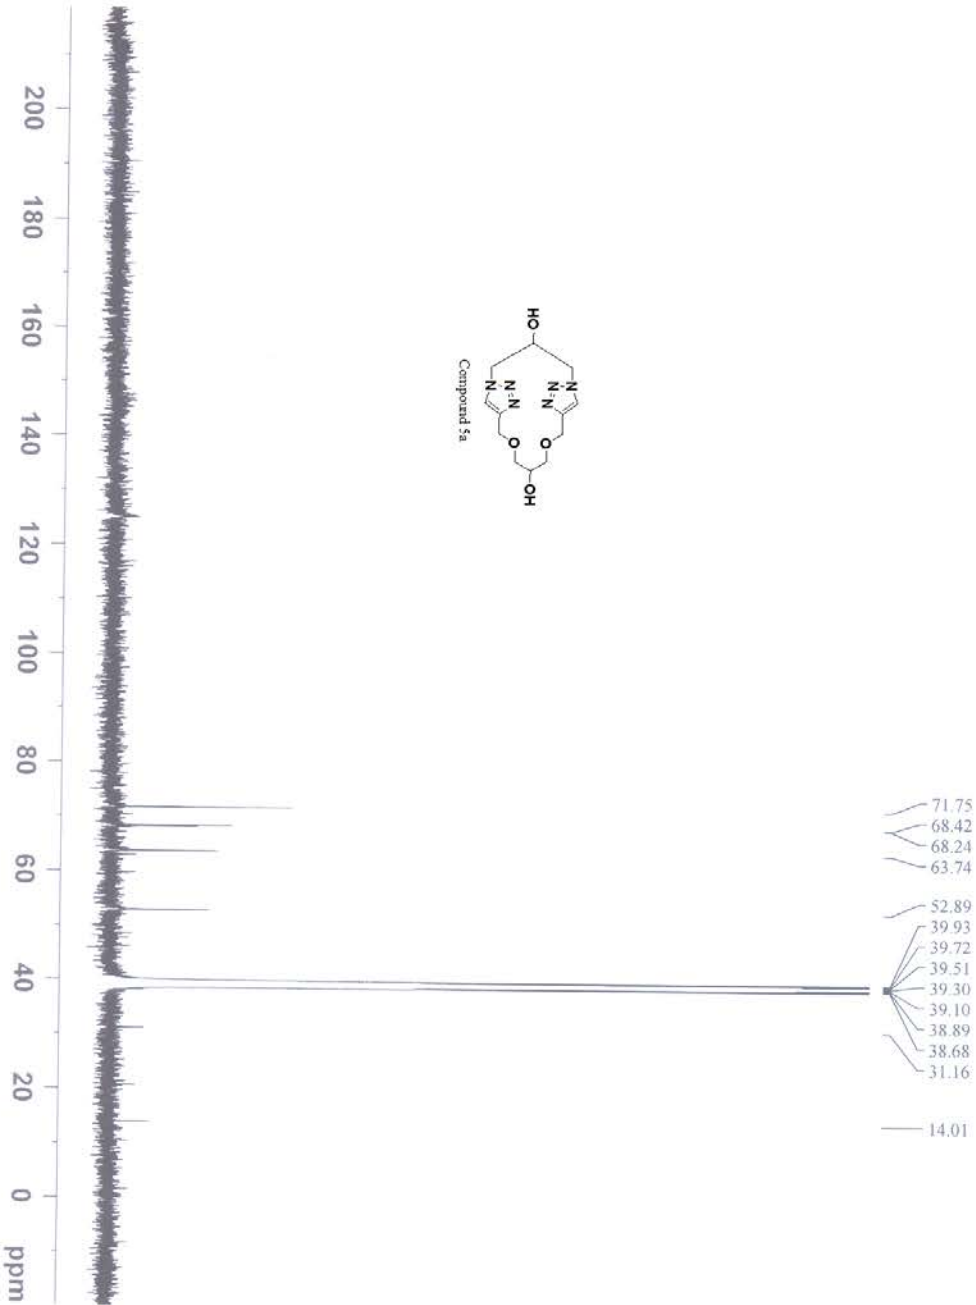

```

NAME          mly-144
EXPNO         21
PROCNO        1
Date_         20110331
Time_         21.59
INSTRUM       spect
PROBHD        5 mm PABBO 5B-
PULPROG       zgpg30
TD            65536
SOLVENT       DMSO
NS            3072
DS            4
SWH           24038.461 Hz
FIDRES        0.366798 Hz
AQ            1.3631988 sec
RG            203
DW            20.800 usec
DE            6.50 usec
TE            294.2 K
D1            2.00000000 sec
D11           0.03000000 sec
TD0           1

===== CHANNEL f1 =====
NUC1          13C
P1            9.50 usec
PL1          -1.00 dB
PL1M         44.90434265 W
SFO1         100.6228258 MHz

===== CHANNEL f2 =====
CPDPRG2      waltz16
NUC2          1H
PCPD2        80.00 usec
PL2          -2.00 dB
PL12         14.33 dB
PL13         16.33 dB
PL14         14.80958652 W
PL15         0.35418071 W
PL16         0.13725966 W
SFO2         400.1315005 MHz
SI           32768
WDW          EM
SSB          0
LB           1.00 Hz
GB           0
PC           1.40
    
```

## Mass Spectrum List Report

### Analysis Info

Analysis Name D:\Data\KARTHA\11-03-09-MTY-137.d  
Method tune\_low.m  
Sample Name MTY-137  
Comment

Acquisition Date 3/10/2011 3:35:54 PM

Operator VIKAS GROVER  
Instrument / Ser# maXis 40

### Acquisition Parameter

|             |            |                       |           |                  |           |
|-------------|------------|-----------------------|-----------|------------------|-----------|
| Source Type | ESI        | Ion Polarity          | Positive  | Set Nebulizer    | 0.4 Bar   |
| Focus       | Not active | Set Capillary         | 4500 V    | Set Dry Heater   | 180 °C    |
| Scan Begin  | 50 m/z     | Set End Plate Offset  | -500 V    | Set Dry Gas      | 4.0 l/min |
| Scan End    | 1000 m/z   | Set Collision Cell RF | 300.0 Vpp | Set Divert Valve | Source    |

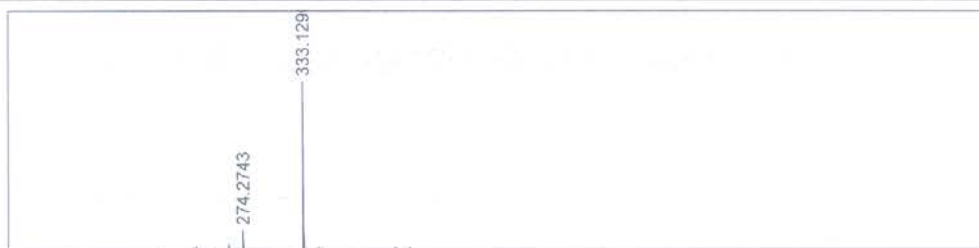

+MS, 1.7min #101

| # | m/z      | Res.  | S/N     | I      | FWHM   |
|---|----------|-------|---------|--------|--------|
| 1 | 261.0584 | 28898 | 568.9   | 7798   | 0.0090 |
| 2 | 274.2743 | 26857 | 1813.5  | 25638  | 0.0102 |
| 3 | 333.1290 | 20489 | 12286.3 | 220869 | 0.0163 |

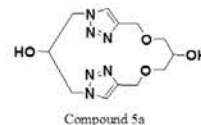

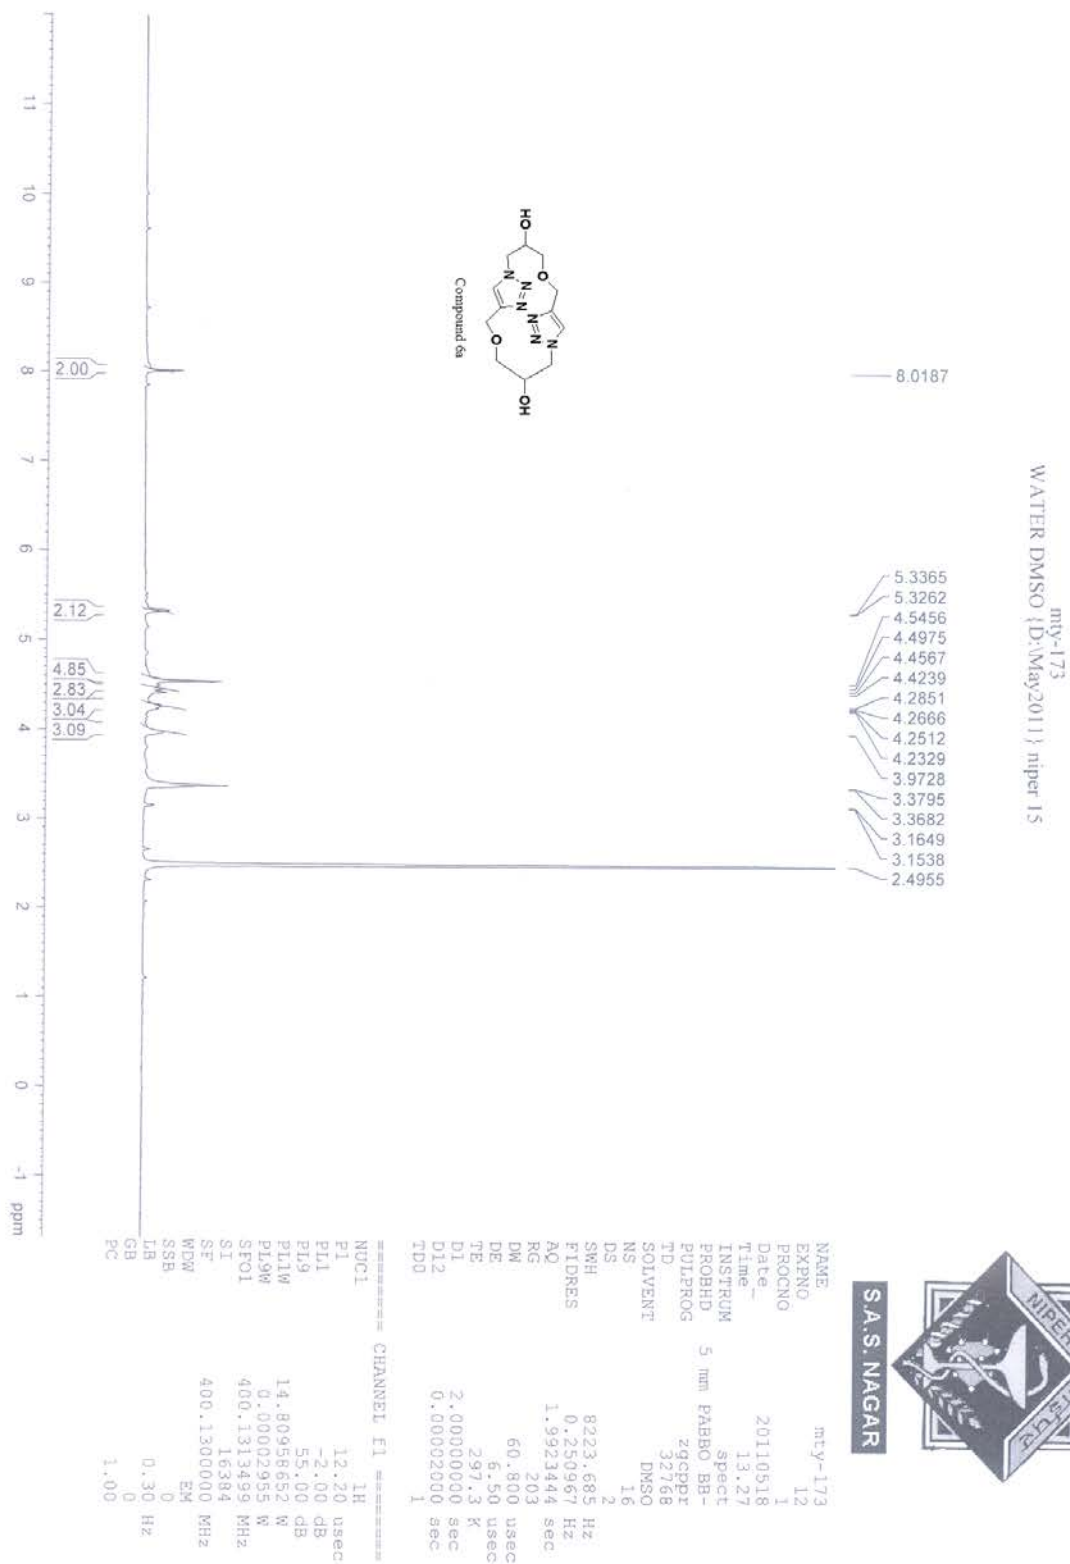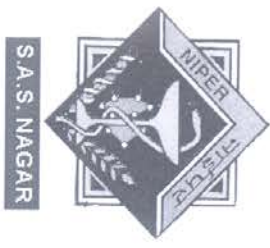

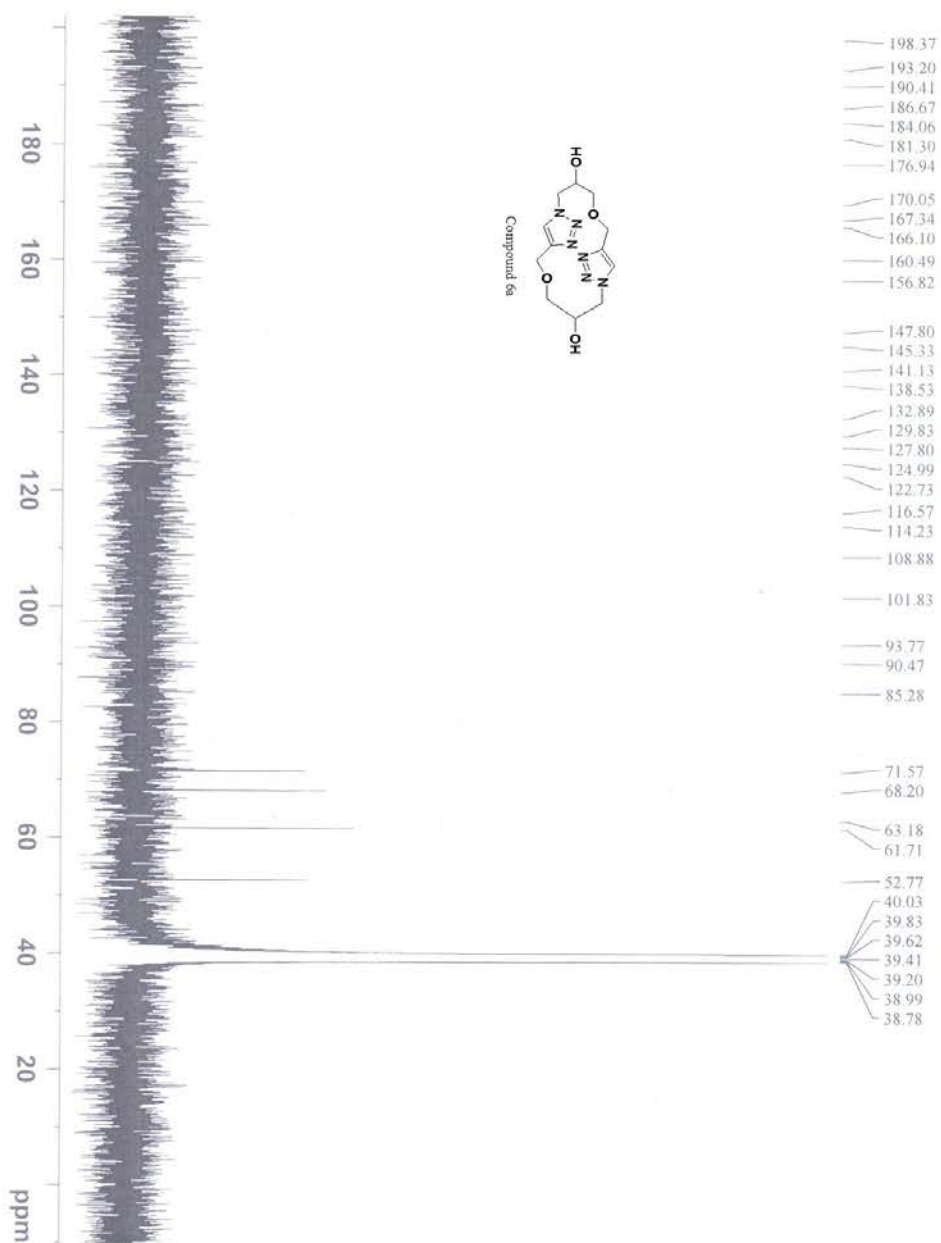

mcy-173  
 C13CPD DMSO (D:\May2011) niper 40

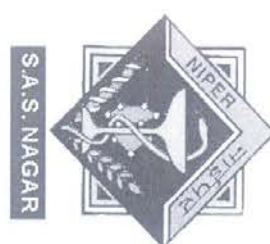

```

NAME          mcy-173
EXPNO         20
PROCNO        1
Date_         20110527
Time         22.38
INSTRUM       spect
PROBHD        5 mm PABBO BB-
PULPROG       zgpg30
TD            65536
SOLVENT       DMSO
NS            5120
DS            4
SFO          240.98461 Hz
FIDRES        0.366798 Hz
AQ            1.3531988 sec
RG            203
DM            20.800 usec
DE            6.50 usec
TE            300.0 K
D1            2.00000000 sec
D11           0.03000000 sec
TD0           1

===== CHANNEL F1 =====
NUC1          13C
P1            9.50 usec
PL1          -1.00 dB
PL1W          44.90434265 W
SFO1         100.6282598 MHz

===== CHANNEL F2 =====
CPDPRG2      waltz16
NUC2          1H
PCPD2        80.00 usec
PL2          -2.00 dB
PL12         14.33 dB
PL13         18.33 dB
PL14         14.8956642 W
PL15         0.24478071 W
PL16         0.13725666 W
PR02         400.1310005 MHz
SFO2         400.1310005 MHz
SI1          32.768
SI2          100.618193 MHz
SFO3         25
NS2          1
DS2          1
SFO4         1.40
    
```

### Mass Spectrum List Report

#### Analysis Info

Analysis Name D:\Data\KARTHA\11-03-09-MTY-136.d  
Method tune\_low.m  
Sample Name MTY-136  
Comment

Acquisition Date 3/10/2011 3:40:51 PM

Operator VIKAS GROVER  
Instrument / Ser# maXis 40

#### Acquisition Parameter

|             |            |                       |           |                  |           |
|-------------|------------|-----------------------|-----------|------------------|-----------|
| Source Type | ESI        | Ion Polarity          | Positive  | Set Nebulizer    | 0.4 Bar   |
| Focus       | Not active | Set Capillary         | 4500 V    | Set Dry Heater   | 180 °C    |
| Scan Begin  | 50 m/z     | Set End Plate Offset  | -500 V    | Set Dry Gas      | 4.0 l/min |
| Scan End    | 1000 m/z   | Set Collision Cell RF | 300.0 Vpp | Set Divert Valve | Source    |

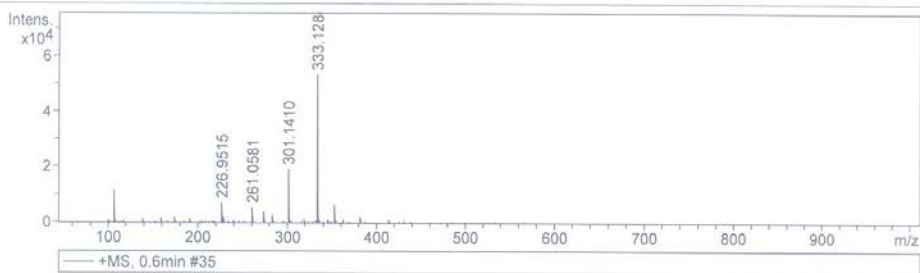

| # | m/z      | Res.  | S/N    | I     | FWHM   |
|---|----------|-------|--------|-------|--------|
| 1 | 226.9515 | 30261 | 368.9  | 7114  | 0.0075 |
| 2 | 229.0319 | 26280 | 98.5   | 1901  | 0.0087 |
| 3 | 261.0581 | 25098 | 283.8  | 5516  | 0.0104 |
| 4 | 301.1410 | 29044 | 923.3  | 18969 | 0.0104 |
| 5 | 333.1284 | 24894 | 2453.4 | 53092 | 0.0134 |

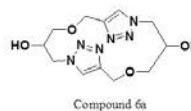

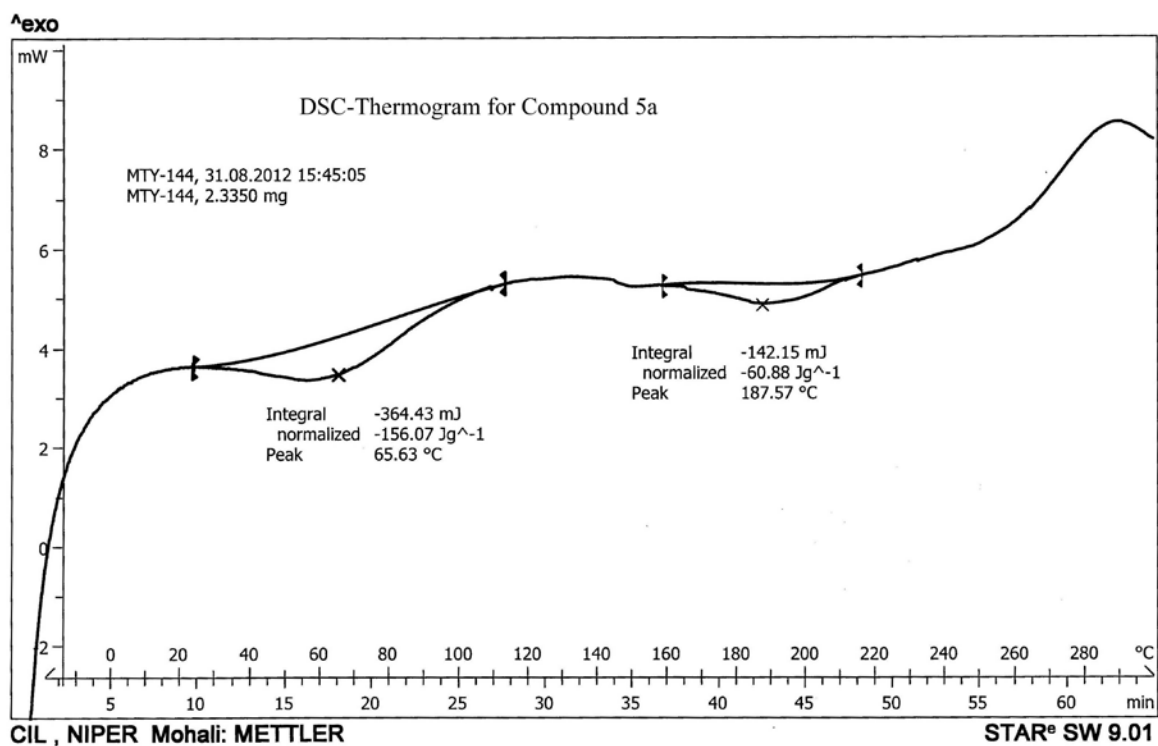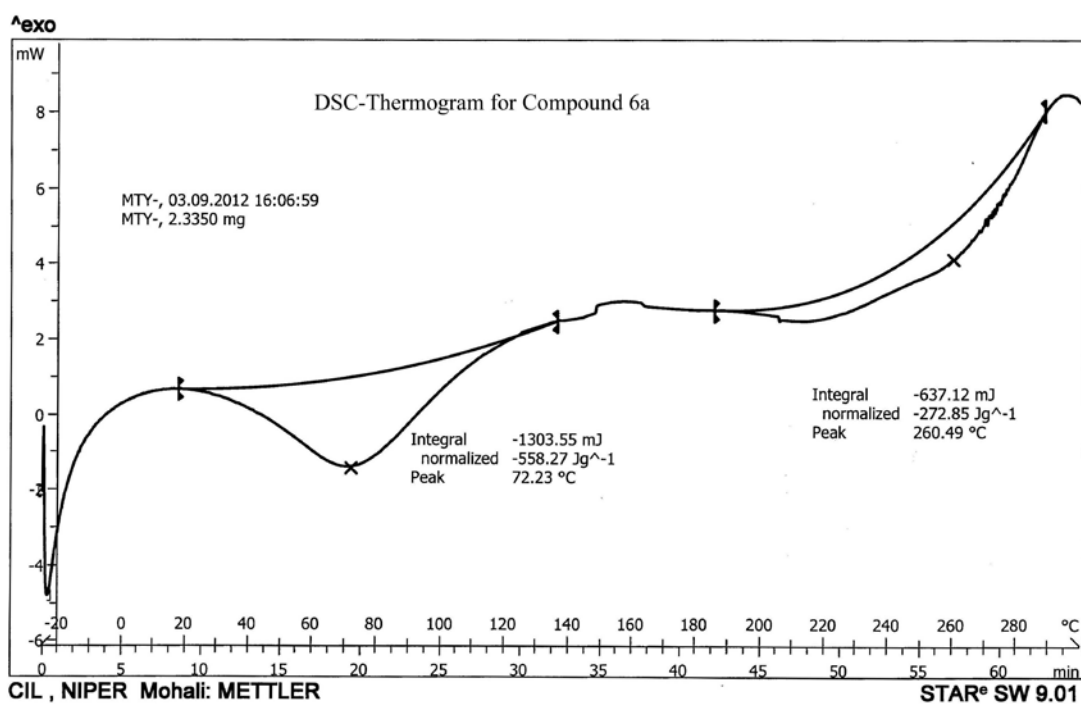

Supplement: c2ra21341a.pdf [file c2ra21341a.pdf]
